# Supplementary material for: The proteasome regulator PI31 is required for protein homeostasis, synapse maintenance, and neuronal survival in mice
Source: PubMed Central journal article supplement — Proc Natl Acad Sci U S A. 2019 Nov 21;116(49):24639–50. doi: 10.1073/pnas.1911921116 (PMC6900516; doi:10.1073/pnas.1911921116), 2019-11-21
Supplement: pnas.1911921116.sapp.pdf [file pnas.1911921116.sapp.pdf]

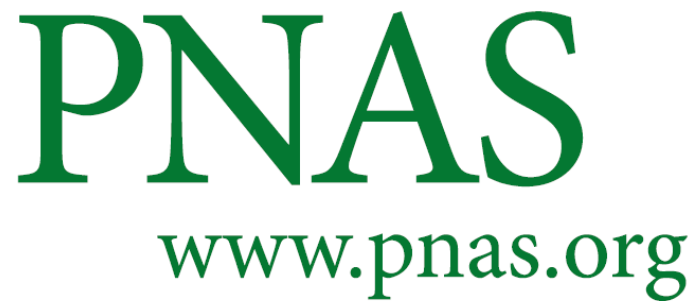

Supplementary Information for

**The proteasome regulator PI31 is required for protein homeostasis, synapse maintenance and neuronal survival in mice**

Adi Minis<sup>1,\*</sup>, Jose A. Rodriguez<sup>1,\*</sup>, Avi Levin<sup>1,3\*</sup>, Kai Liu<sup>1</sup>, Eve-Ellen Govek<sup>2</sup>, Mary E. Hatten<sup>2</sup>, Hermann Steller<sup>1</sup>

Mary E. Hatten

Email: [Hatten@rockefeller.edu](mailto:Hatten@rockefeller.edu)

**This PDF file includes:**

Figures S1 to S9  
Tables S1 to S5  
Legends for Movies S1 to S3

**Other supplementary materials for this manuscript include the following:**

Movies S1 to S3

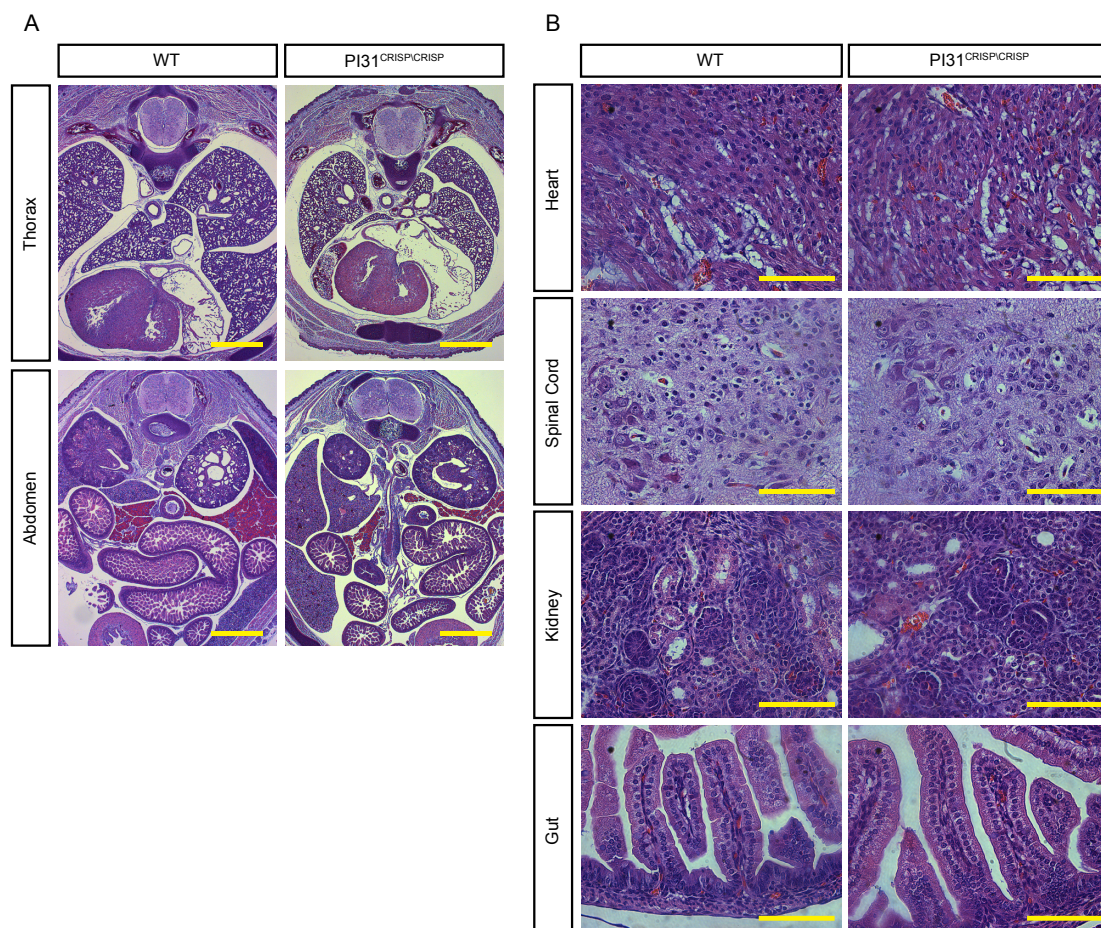

**Fig. S1.** Histological analysis of E18.5 PI31<sup>CRISPR/CRISPR</sup> embryos. Low (A) and high (B) magnification of H&E coronal sections taken from different levels of the apical-caudal axis of E18.5 PI31<sup>CRISPR/CRISPR</sup> and control littermates. Loss of PI31 did not have profound consequences for the development of many embryonic tissues and organs. Scale bars are 1mm and 0.01mm for figures in panel A and B respectively.

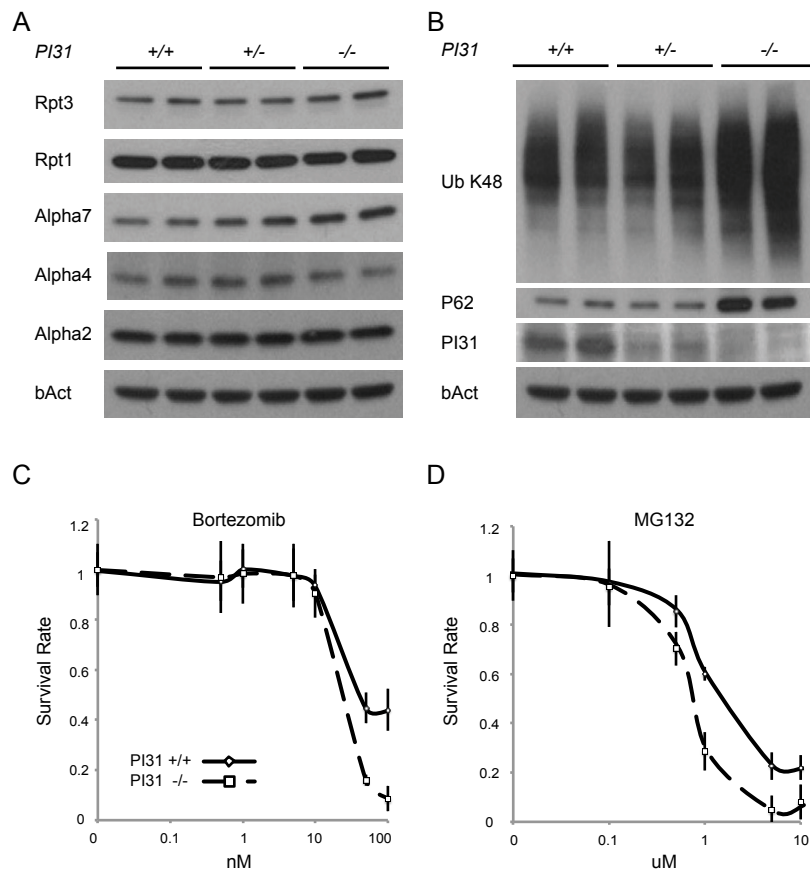

**Fig. S2. Loss of PI31 sensitizes mouse embryonic fibroblasts to proteotoxic stress (A)**

Analysis of proteasomal proteins in PI31-Null MEFs. Western blot analysis of WT, heterozygous and PI31 KO MEFs for individual proteasome subunits does not indicate substantial changes.

(B) Western blot analysis of WT, Heterozygous and KO MEFs shows accumulation of poly-ubiquitinated proteins (Ub K48) and increased levels of the stress marker p62 in KO MEFs.

C, D Diagrams showing survival rate of WT and KO MEFs treated with Bortezomib (C) and MG 132 (D) indicated concentrations (average of 3 experiments, each experiment was done in triplicate).

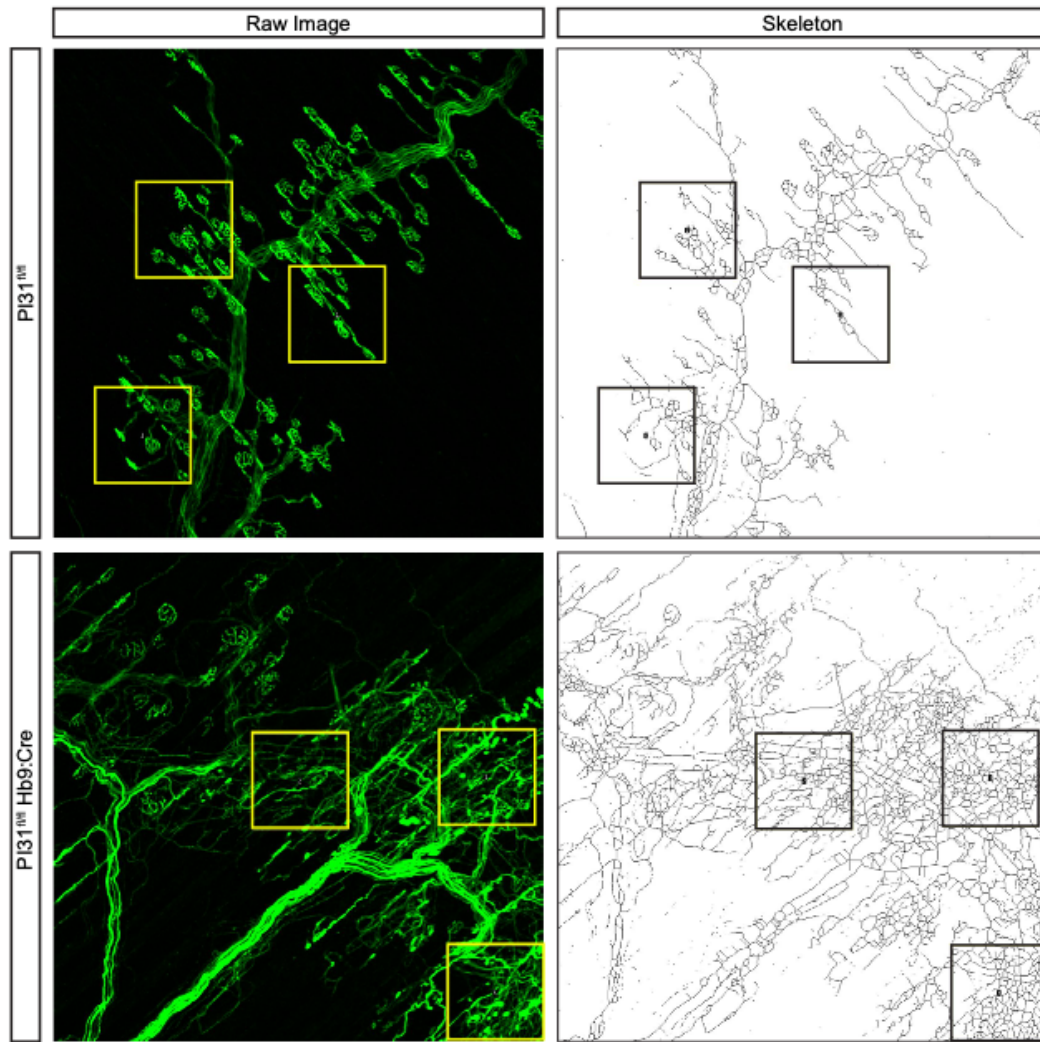

**Fig. S3. Quantification of Axonal Sprouting**

For each image, 3 Regions Of Interest (ROI) 200x200 pixels were chosen in relevant areas. Using Fiji image analysis software tools, images were then skeletonized. Total axonal length was measured in all ROIs and was subjected to statistical analysis.

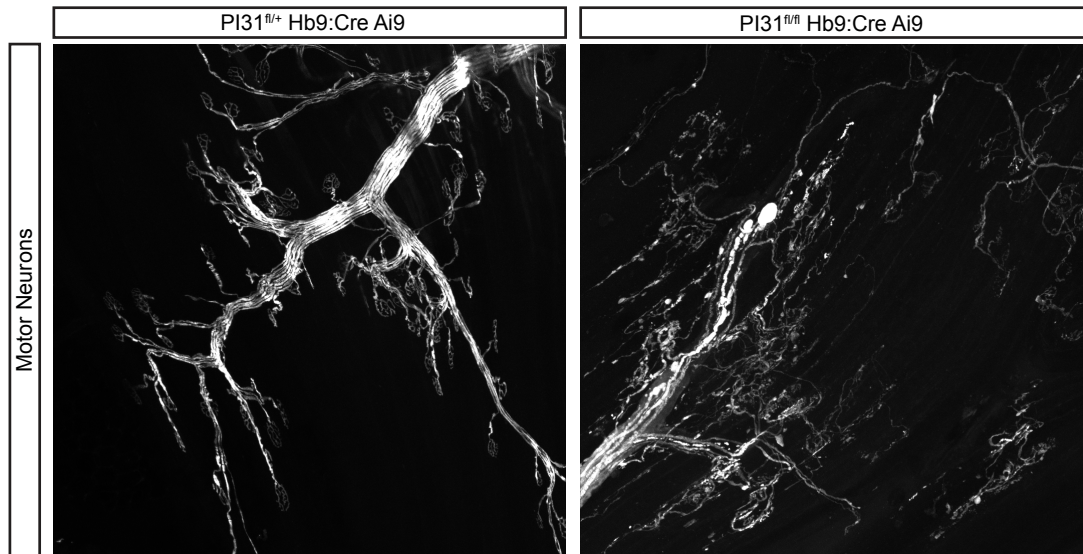

**Fig. S4: PI31 Hb9-Cre Heterozygous animals do not show any phenotype**

Triangularis Sterni muscle innervation by motor neurons of PI31<sup>fl/f</sup> Hb9-Cre Ai9 and PI31<sup>f/+</sup> Hb9-Cre Ai9 mice. Heterozygous PI31 mutants muscle innervation is similar to that of WT. Ai9 mice express tdTomato in a Cre dependent way.

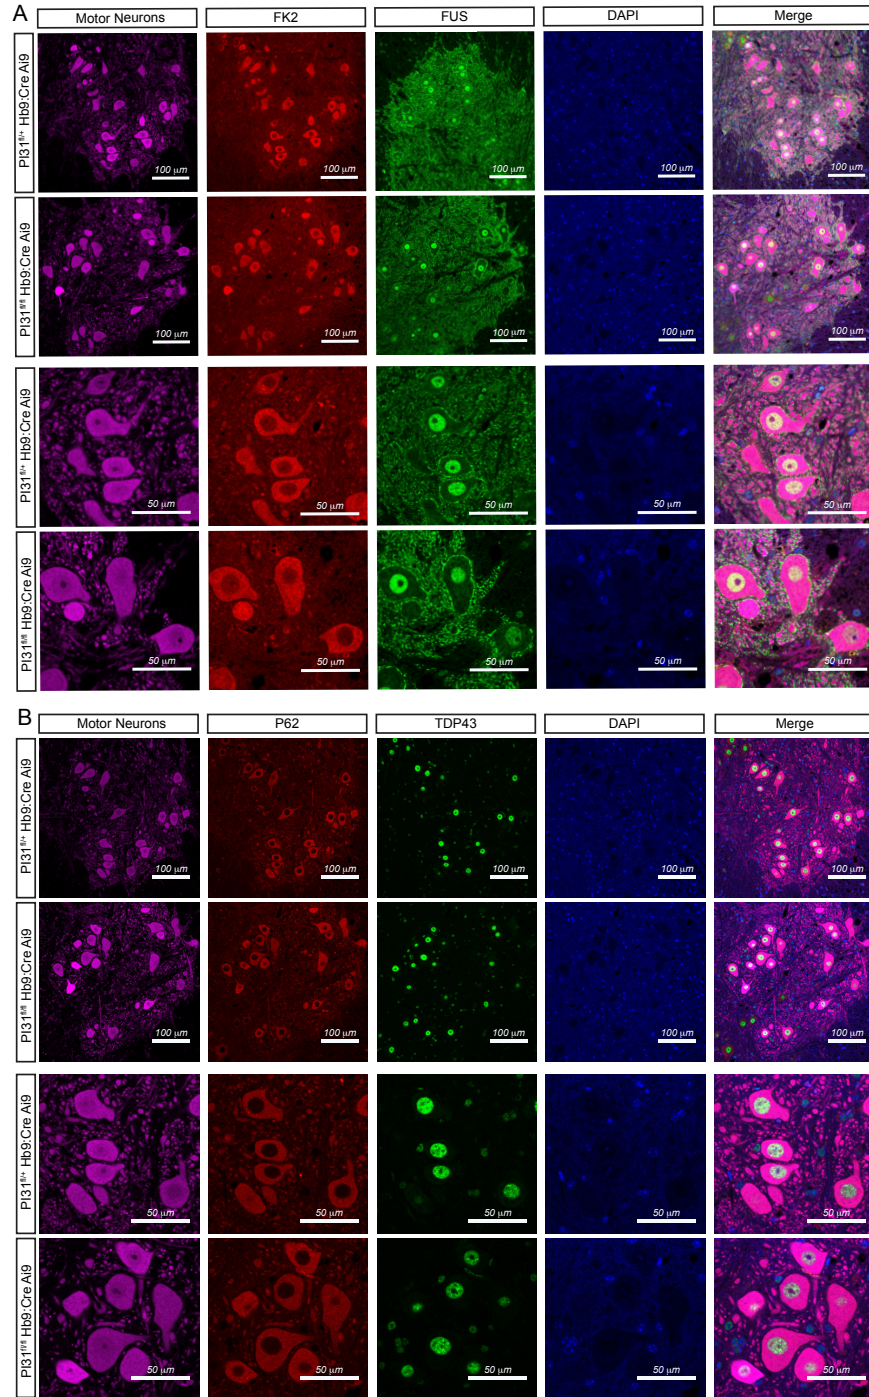

**Fig. S5: PI31-deficient motor neurons do not express proteotoxic stress markers in the soma at 5 months of age.**

A, B Immunofluorescence analysis of motor neuron somata did not reveal any significant differences in poly-ubiquitinated proteins (FK2), P62 aggregates or FUS and TDP43 localization between PI31<sup>fl/f</sup> Hb9-Cre Ai9 and PI31<sup>fl/+</sup> Hb9-Cre Ai9 mice. At this age, axonal health was severely impaired.

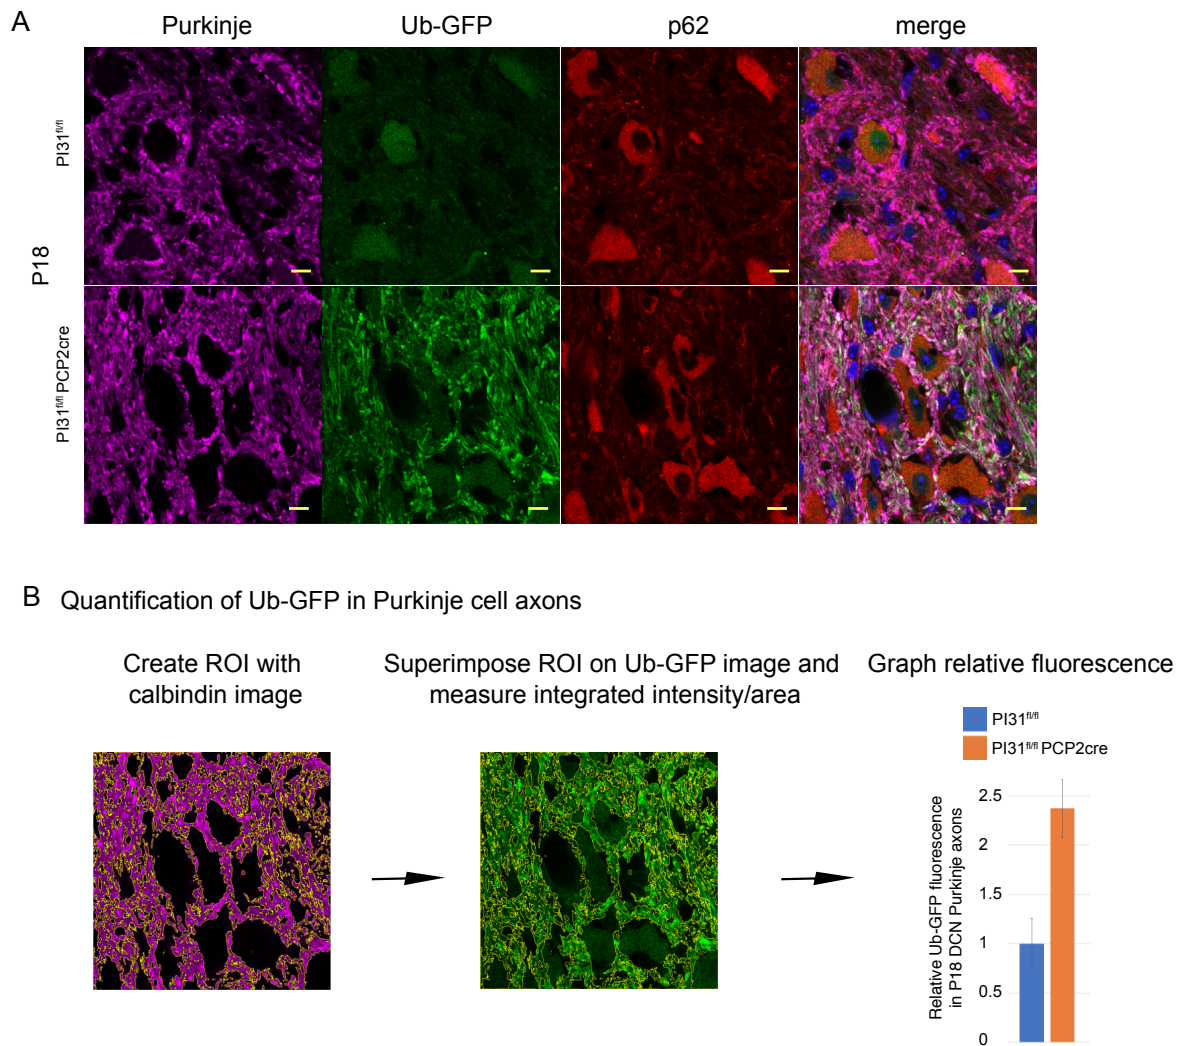

**Fig. S6: Loss of PI31 in Purkinje cells leads to an increase of the proteasome substrate Ub-GFP in the DCN of the cerebellum.** (A,B) P18 cerebellum labeled for Calbindin (magenta) to mark Purkinje cells, Ub-GFP (green), p62 (red), and Hoechst 33342 (blue) for nuclei. *PI31<sup>fl/fl</sup>* and *PI31<sup>fl/fl</sup> Pcp2-Cre* denote *PI31<sup>fl/fl</sup> Ub-GFP* and *PI31<sup>fl/fl</sup> Pcp2-Cre Ub-GFP* mice respectively. (A) By P18, we can see a clear increase of Ub-GFP in Purkinje axons in the DCN of *PI31<sup>fl/fl</sup> Pcp2-Cre* mice as compared to control *PI31<sup>fl/fl</sup>* littermates. Scale bar 10  $\mu$ m. (B) Illustration of Ub-GFP quantification in Purkinje cell axons using ImageJ software. Statistical significance between loss of PI31 mice and control mice is  $p=0.0037$  (two-tailed T test).

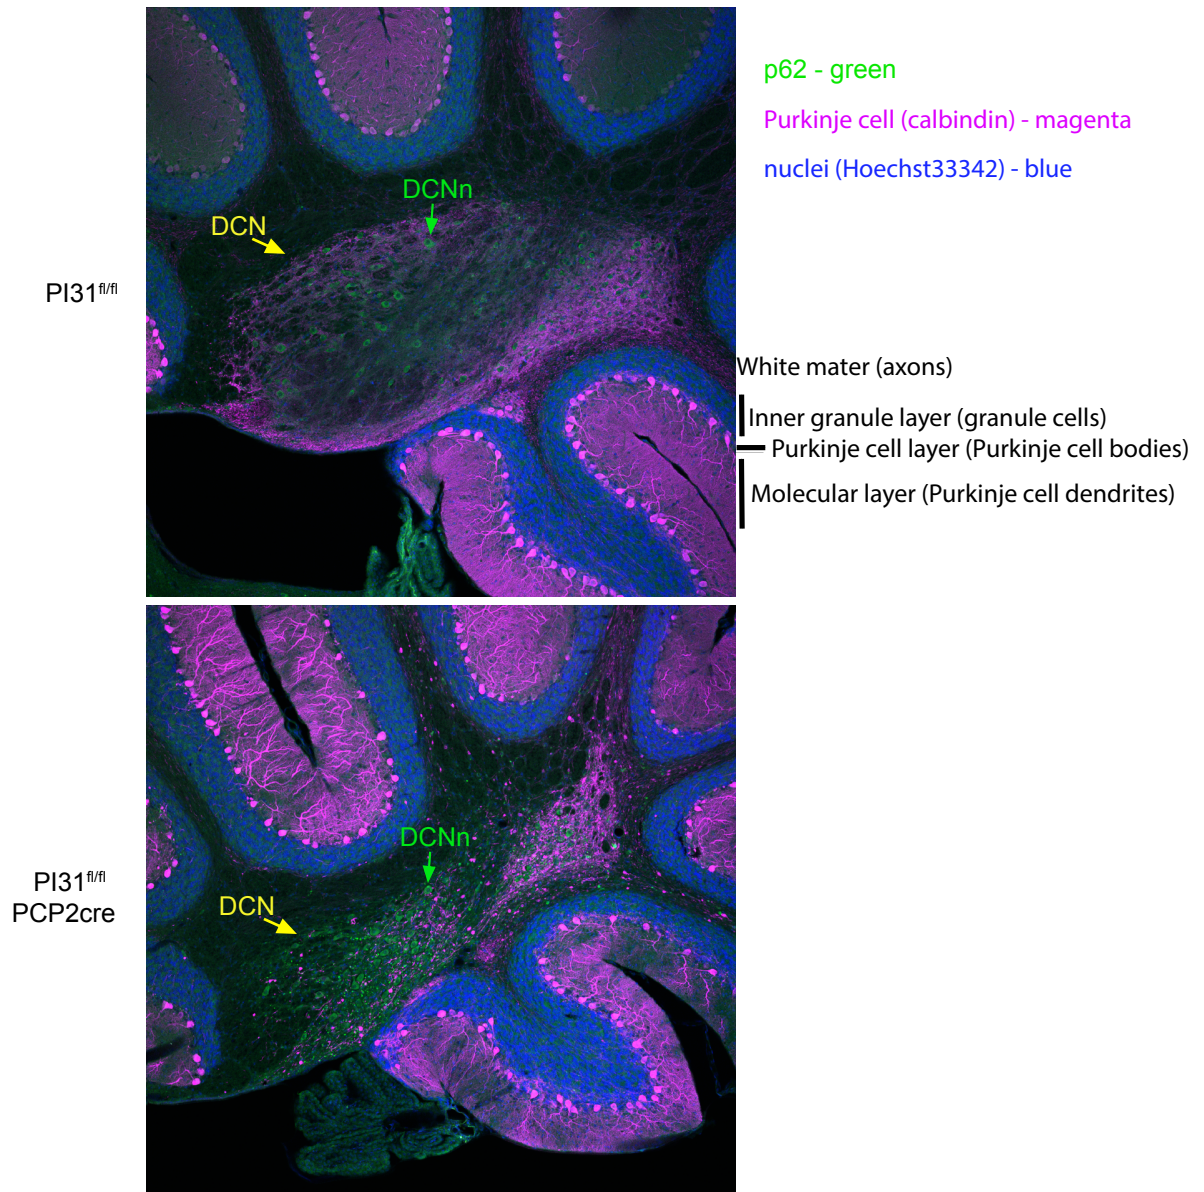

**Fig. S7: *PI31<sup>fl/fl</sup> Pcp2-Cre* mice accumulate p62-positive aggregates only in the DCN.**

Overview of p62-positive aggregates (green) which accumulated in the DCN (yellow arrow) of 2-month old *PI31<sup>fl/fl</sup> Pcp2-Cre* mice. The size of the DCN was reduced in *PI31<sup>fl/fl</sup> Pcp2-Cre* mice, presumably due to loss of PC axon terminals (magenta).

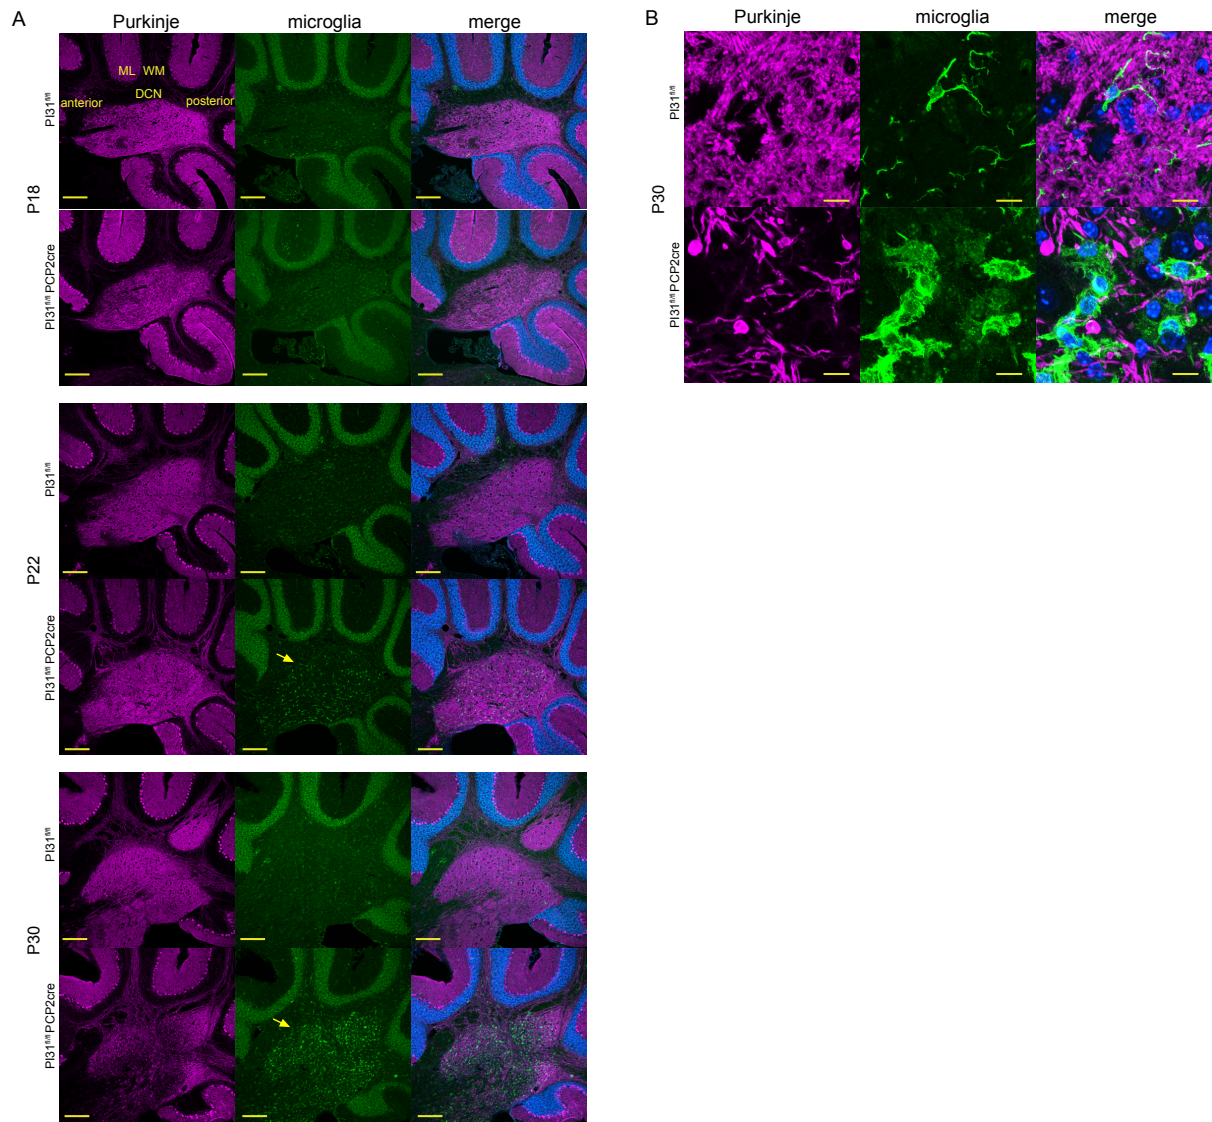

**Fig. S8: Loss of PI31 in Purkinje cells leads to gliosis in the DCN of the cerebellum.** (A,B) Cerebellum from P18, P22 and P30 *PI31<sup>fl/fl</sup>* and *PI31<sup>fl/fl</sup> Pcp2-Cre* mice stained with Calbindin (magenta) for Purkinje cells, Iba1 (green) for microglia, and Hoechst 33342 for nuclei (blue). (A) At P18, no difference is seen in microglia between *PI31<sup>fl/fl</sup> Pcp2-Cre* mice and their control littermates. However, at P22 we began to detect reactive microglia in the DCN of *PI31<sup>fl/fl</sup> Pcp2-Cre* mice. The number of reactive microglia greatly increased in the DCN of P30 *PI31<sup>fl/fl</sup> Pcp2-Cre* mice indicating the induction of gliosis. Yellow arrows point to reactive microglia in the DCN. Scale bar 100  $\mu$ m. (B) Higher magnification of P30 mice DCN shows the morphologically distinct ramified microglia in *PI31<sup>fl/fl</sup>* control siblings and reactive microglia in *PI31<sup>fl/fl</sup> Pcp2-Cre* mice. DCN (deep cerebellar nuclei), ML (molecular layer) and WM (white matter). Scale bar 10  $\mu$ m.

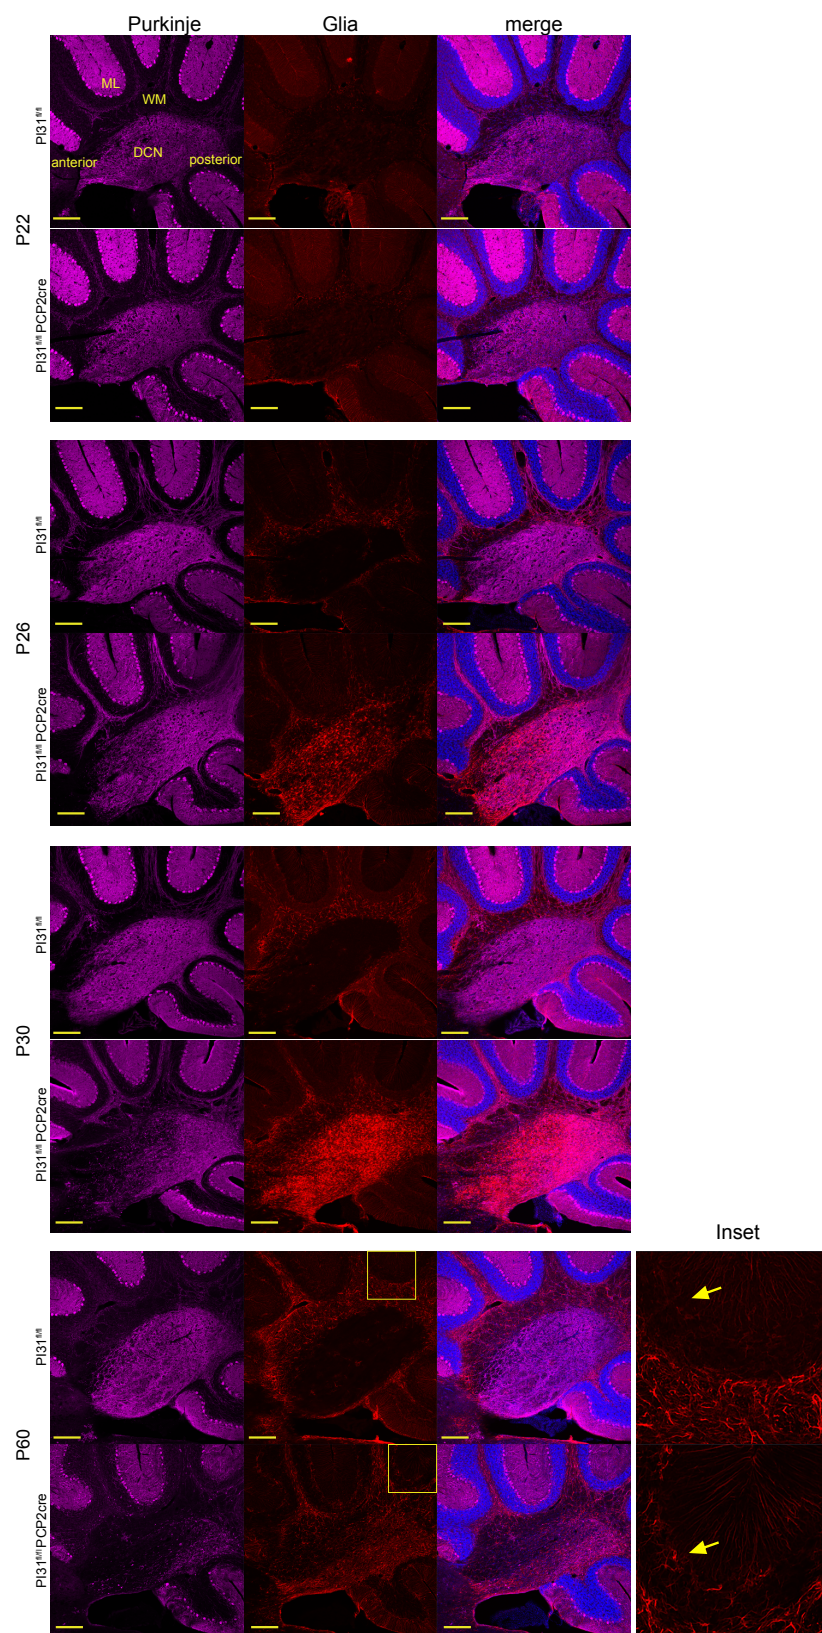

**Fig. S9: Loss of PI31 in Purkinje cells leads to astrogliosis in the DCN of the cerebellum.** Cerebellum from P22, P26, P30 and P60 *PI31<sup>fl/fl</sup>* and *PI31<sup>fl/fl</sup> Pcp2-Cre* mice stained with Calbindin (magenta) for Purkinje cells, GFAP (red) for glia, and Hoechst 33342 for nuclei (blue). PC axon terminals in the DCN of *PI31<sup>fl/fl</sup> Pcp2-Cre* looked normal at P22, but evidence of axon swelling and loss became apparent at P26 and prominent at P30. At P60, loss of axon terminals in *PI31<sup>fl/fl</sup> Pcp2-Cre* mice was nearly complete. GFAP staining in cerebellum of *PI31<sup>fl/fl</sup> Pcp2-Cre* mice was similar to that of control littermates at P22. At P26, gliosis in the DCN became apparent, and at P30 there was a dramatic increase of glia staining strongly for GFAP in the DCN. This effect appears to be specific to the PC axons, as it was not observed in the Purkinje or molecular layers. At P60, there were also some reactive astrocytes in the Purkinje layer (inset), coinciding with the onset of PC loss. DCN (deep cerebellar nuclei), ML (molecular layer) and WM (white matter). Scale bar 100  $\mu$ m.

| Antigen                                   | Company              | Cat#       | Host     | Isotype | WB      | IHC-P/IF  | HIER                   | Wholemout                   |
|-------------------------------------------|----------------------|------------|----------|---------|---------|-----------|------------------------|-----------------------------|
| Proteasome 20S alpha7 subunit (MCP72)     | Enzo                 | BML-PW8110 | Mouse    | IgG1    | 1:5000  |           |                        |                             |
| Ubi-FK2                                   | Enzo                 | BML-PW8810 | Mouse    | IgG1    | 1:1000  | 1:100-200 |                        |                             |
| P62                                       | Abcam                | ab56416    | Mouse    | IgG2a   | 1:2500  | 1:500     | Sodium-Citrate pH 6.00 | 1:500 (Alexa647 Conjugated) |
| PI31                                      | Abcam                | ab140497   | Rabbit   |         | 1:1000  |           |                        |                             |
| PI31                                      | Thermo Fisher Sci.   | PA5-18133  | Goat     |         | 1:2000  |           |                        |                             |
| Actin (HRP conjugated)                    | Cell Signaling Tech. | 5125S      | Rabbit   |         | 1:10000 |           |                        |                             |
| Tuj1                                      | BD Pharmingen        | 560339     | Mouse    | IgG2a   |         |           |                        | 1:200 (Alexa488 Conjugated) |
| Synapsin                                  | Cell Signaling Tech. | 13197      | Rabbit   | IgG     |         |           |                        | 1:200 (Alexa488 Conjugated) |
| Alpha-Bungarotoxin                        | Invitrogen           | B-13423    | N/A      | N/A     |         |           |                        | 100ng/ml                    |
| td-Tomato                                 | SICGEN               | AB8181-200 | Goat     |         |         | 1:200     | Sodium-Citrate pH 6.00 |                             |
| FUS                                       | Sigma-Aldrich        | HPA008784  | Rabbit   | IgG     |         | 1:2000    | Sodium-Citrate pH 6.00 |                             |
| TDP43                                     | Abcam                | ab109535   | Rabbit   | IgG     |         | 1:1000    | Sodium-Citrate pH 6.00 |                             |
| Proteasome 19S Rpt3/S6b subunit (TBP7-27) | Enzo                 | BML-PW8765 | Mosue    | IgG1    | 1:1000  |           |                        |                             |
| Proteasome 19S Rpt1/S7 subunit (MSS1-104) | Enzo                 | BML-PW8825 | Mouse    | IgG1    | 1:3000  |           |                        |                             |
| Proteasome 20S alpha4 subunit (MCP79)     | Enzo                 | BML-PW9140 | Mouse    | IgG1    | 1:2000  |           |                        |                             |
| Proteasome 20S alpha2 subunit (MCP21)     | Enzo                 | BML-PW8105 | Mouse    | IgG1    | 1:2000  |           |                        |                             |
| Ub K48                                    | Abcam                | ab140601   | Rabbit   | IgG     | 1:1000  |           |                        |                             |
| GFP                                       | Thermo Fisher Sci.   | A11122     | Rabbit   | IgG     |         | 1:2000    |                        |                             |
| Calbindin                                 | Swant                | 300        | Mouse    | IgG1    |         | 1:1000    |                        |                             |
| Calbindin                                 | Hatten Lab           |            | Rabbit   | IgG     |         | 1:1000    |                        |                             |
| Calbindin                                 | EnCor                | CPCA-Calb  | Chiccken | IgY     |         | 1:1000    |                        |                             |
| NeuN                                      | Abcam                | ab207282   | Rabbit   | IgG     |         | 1:100     |                        |                             |
| GFAP                                      | Dako                 | Z0334      | Rabbit   | IgG     |         | 1:500     |                        |                             |
| GFAP                                      | EnCor                | CPCA-GFAP  | Chiccken | IgY     |         | 1:2000    |                        |                             |
| Iba                                       | Wako                 | 019-19741  | rabbit   | IgG     |         | 1:1000    |                        |                             |

**Table S1 Antibody details**

| #  | Mouse strain      | Catalog#                           | Company                         | Notes                        |
|----|-------------------|------------------------------------|---------------------------------|------------------------------|
| 1  | PI31CRISPR        | N/A                                | Generated By This Lab           | Available on request         |
| 2  | PI31 KOF          | Psmf1 <sup>tm1a</sup> (EUCOMM)Hmgu | EUCOMM                          | Generated from ES cells      |
| 3  | PI31 floxed       | Psmf1 <sup>tm1c</sup> (EUCOMM)Hmgu | EUCOMM                          | By Cross to FLP1 recombinase |
| 4  | FLP-1 Recombinase | 5703                               | Jackson Laboratory              |                              |
| 5  | CDX2-Cre          | 9350                               | Jackson Laboratory              |                              |
| 6  | Hb9-Cre           | 6600                               | Jackson Laboratory              |                              |
| 7  | UbcCre-ERT2       | 7001                               | Jackson Laboratory              |                              |
| 8  | Pcp2-Cre          | Tg(Pcp2-Cre)GN135Gsat              | GENSAT (Rockefeller University) |                              |
| 9  | Ub-G76V-GFP       | 008111                             | Jackson Laboratory              |                              |
| 10 | Ai9               | 7909                               | Jackson Laboratory              |                              |

**Table S2. Mouse strains.**

| Strain             | Forward                        | Reverse                            | Annealing Temp | Product Size           |
|--------------------|--------------------------------|------------------------------------|----------------|------------------------|
| PI31 CRISPR        | TGG CTT TGG CAC GGT CA         | GGA AGT GGT GAC AAA CGG C          | 55             | WT-111bp/CRISPR - 95bp |
| LacZ               | ATT CCA GCT GAG CGC CGG TCG C  | GCG AGC TCA GAC CAT AAC TTC GTA TA | 55             | 400                    |
| Cre                | CAG GGT GTT ATA AGC AAT CCC    | CCT GGA AAA TGC TTC TGT CCG        | 55             | 250                    |
| PI31 floxed and WT | CAC CCT GGA CTG TGA ACA CC     | TGT TTG CAC CTA AGA ACC CAG T      | 60             | WT-250bp/ Floxed 400bp |
| GFP                | GCA CCA TCT TCT TCA AGG ACG AC | TCT TTG CTC AGG GCG GAC TG         | 60             | 343                    |
| Ai9 (tdTomato)     | CTG TTC CTG TAC GGC ATG G      | GGC ATT AAA GCA GCG TAT CC         | 60             | 196                    |
| Rosa               | AAG GGA GCT GCA GTG GAG TA     | CCG AAA ATC TGT GGG AAG TC         | 60             | 297                    |
| FLPe               | TGC CGG TCC TAT TTA CTC GT     | TAC TTC TTT AGC GCA AGG GGT AG     | 60             | 100                    |

**Table S3 Genotyping primers**

| Step # | Temp °C | Time   | Note                                       |
|--------|---------|--------|--------------------------------------------|
| 1      | 94      | 2 min  |                                            |
| 2      | 94      | 20 sec |                                            |
| 3      | 65      | 15 sec | -0.5 C per cycle decrease                  |
| 4      | 68      | 1 min  |                                            |
| 5      |         |        | repeat steps 2-4 for 10 cycles (Touchdown) |
| 6      | 94      | 15 sec |                                            |
| 7      | 55      | 15 sec |                                            |
| 8      | 72      | 1 min  |                                            |
| 9      |         |        | repeat steps 6-8 for 28 cycles             |
| 10     | 72      | 2 min  |                                            |
| 11     | 4       |        | Hold                                       |

**Table S4 Genotyping PCR program.** This program was used with all primer sets.

| Reagent                                                     | Company                  | Cat#        |
|-------------------------------------------------------------|--------------------------|-------------|
| Purified Bovine 20S Proteasome                              | UBPBio                   | A1401       |
| Purified Bovine 26S Proteasome                              | UBPBio                   | A1201       |
| cOmplete, EDTA-free Protease Inhibitor Cocktail             | Sigma-Aldrich            | 1E+10       |
| PhosSTOP™- phosphatase inhibitor tablets                    | Sigma-Aldrich            | 5E+09       |
| Native Sample Buffer                                        | BIO-RAD                  | 161-0738    |
| 3–8% Criterion™ XT Tris-Acetate Protein Gel, 26 well, 15 µl | BIO-RAD                  | 345-0130    |
| Immobilon-P Membrane, PVDF                                  | Sigma-Aldrich            | IPVH85R     |
| Bortezomib                                                  | LC laboratories          | B-1408      |
| MG-132, Ready Made Solution                                 | Sigma-Aldrich            | M7449-1ML   |
| PrestoBlue Cell Viability Reagent                           | Thermo Fisher Scientific | A13262      |
| CAS-Block                                                   | Thermo Fisher Scientific | 00-8120     |
| Richard-Allan Scientific Neg-50™ Frozen Section Medium      | Thermo Fisher Scientific | 6502        |
| Normal Donkey Serum                                         | Jackson ImmunoResearch   | 017-000-121 |
| Triton X-100                                                | BIO-RAD                  | 161-0407    |
| ProLong® Diamond anti-fade mounting medium                  | Thermo Fisher Scientific | P36965      |
| Vectashield                                                 | Vector Laboratories      | H-1000      |

**Table S5 Reagents**

**Movie S1 (separate file). Illustrating neuro-motor phenotype of  $PI31^{fl/fl}$  Cdx2-cre mice**

14 days old  $PI31^{fl/fl}$  and  $PI31^{fl/fl}$  *CDX2-cre* littermates.  $PI31^{fl/fl}$  *CDX2-cre* mice had severe neuromotor phenotypes, characterized by spasticity, rigid muscle tone, strong tremor and a severely impaired righting response.

**Movie S2 (separate file). Illustrating motor defects of  $PI31^{fl/fl}$  Hb9-cre mice**

5 month-old  $PI31^{fl/fl}$  and  $PI31^{fl/fl}$  *Hb9-cre* littermates.  $PI31^{fl/fl}$  *Hb9-cre* mouse had kyphosis and breathing difficulties.

**Movie S3 (separate file). Illustrating cerebellar behavioral defects in  $PI31^{fl/fl}$  *Pcp2-cre* mice**

Movie of 7 month-old male  $PI31^{fl/fl}$  and  $PI31^{fl/fl}$  *Pcp2-cre* siblings. The  $PI31^{fl/fl}$  *Pcp2-cre* mouse had a halting gait and lost balance frequently, falling back or to the left or right.  $PI31^{fl/fl}$  *Pcp2-cre* mouse has difficulty regaining balance as it falls to the left.
